# Supplementary material
Source: publisher site journal article supplement (https://www.dovepress.com/article/394544)
Supplement: Supplementary file 1 [file get_supplementary_file.php]

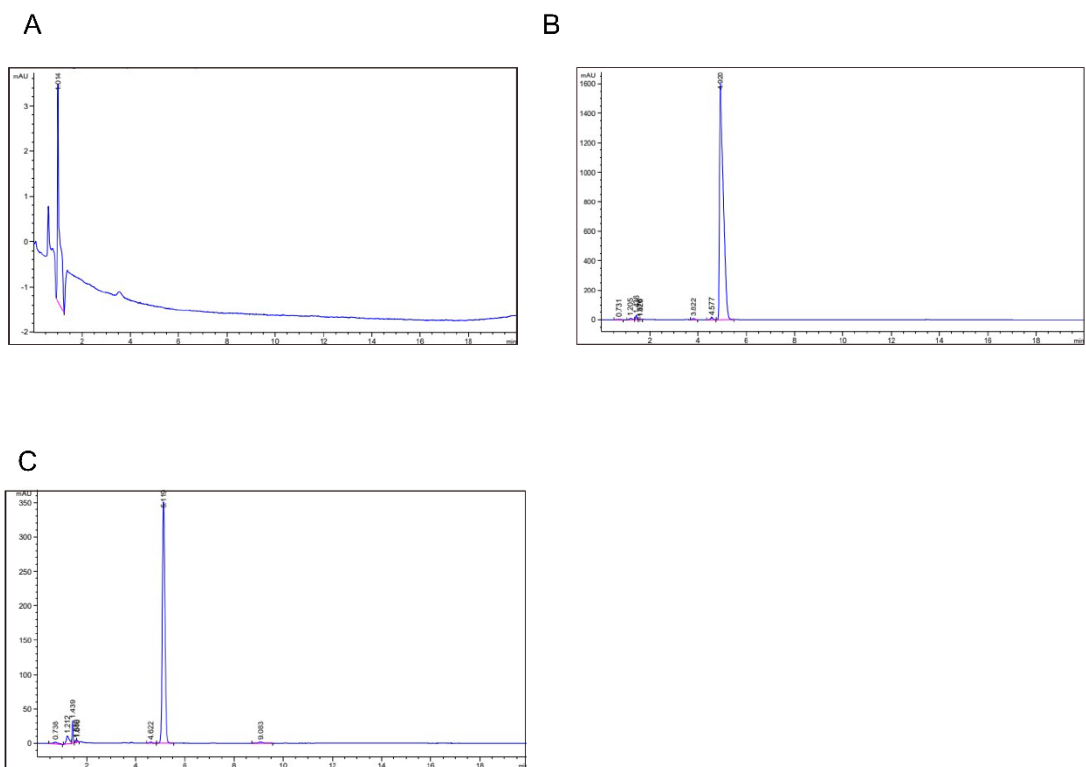

**Supplementary Figure 1: Nano PTL encapsulation rate, drug loading, and infrared spectral characteristics.**

**(A)** Blank control solution. **(B)** Reference solution. **(C)** Sample solution (n=3 independent experiments).

**Supplementary Table 1:** Target genes of sepsis.

|       |                                                                                                                                                                                                                                                                                                                                                                                                    |
|-------|----------------------------------------------------------------------------------------------------------------------------------------------------------------------------------------------------------------------------------------------------------------------------------------------------------------------------------------------------------------------------------------------------|
| Genes | TNF, IL6, IL10, CXCL8, TLR4, CRP, IL1B, HMGB1, TLR2, MYD88, TREM1, CD14, SERPINC1, ALB, MYLK, ELANE, F5, CSF3, TLR5, GALT, F3, LMOD1, LBP, MYH11, IL18, ITGAM, ACTG2, CCL2, CALCA, MIF, MBL2, SERPINE1, GALM, BTK, IFNG, CD4, LCN2, THBD, IL1RN, TLR9, RAC2, CCR6, F2, CSF2, CD40LG, RPSA, LY96, FCGR3B, LTA, NOS2, CASP12, HLA-A, ABCA12, VCAM1, HMOX1, PROCR, IL1R1, IL1A, ICAM1, SERAC1, CXCL10 |
|-------|----------------------------------------------------------------------------------------------------------------------------------------------------------------------------------------------------------------------------------------------------------------------------------------------------------------------------------------------------------------------------------------------------|
